# Supplementary material
Source: publisher figshare collection journal article supplement (https://acs.figshare.com/ndownloader/files/25388667)
Supplement: Supplementary file 1 [file 25388667]

## Sheet: Sheet1
Polymer	Short name	HSP (MPa 1/2)	MHP (Å-2)	Core block DP	Morphology	Rank
Poly(ethyleneglycol-b-4-hydroxybutyl acrylate)	PEG-b-P4HBA	20.6	0.0043	50	Spheres	1
		20.6	0.0043	75	Spheres	1
		20.6	0.0043	100	Spheres	1
		20.6	0.0043	200	Spheres	1
		20.6	0.0043	300	Worms	3
		20.6	0.0043	400	Worms + Vesicles	4
Poly(ethyleneglycol-b-2-hydroxybutyl acrylate)	PEG-b-P2HBA	20.5	0.0067	50	Spheres	1
		20.5	0.0067	75	Spheres	1
		20.5	0.0067	100	Worms	3
		20.5	0.0067	200	Worms + Vesicles	4
Poly(ethyleneglycol-b-2-hydroxypropyl methacrylate)	PEG-b-P3HPMA	20.7	0.0028	50	Spheres	1
		20.7	0.0028	75	Spheres	1
		20.7	0.0028	100	Spheres	1
		20.7	0.0028	200	Spheres	1
		20.7	0.0028	300	Spheres + Worms	2
Poly(ethyleneglycol-b-tetrahydrofurfuryl acrylate)	PEG-b-PTHFA	19	0.00609282	50	Spheres	1
		19	0.00609282	75	Spheres + Worms	2
		19	0.00609282	100	Worms + Vesicles	4
		19	0.00609282	200	Vesicles	5
Poly(ethyleneglycol-b-isobutylmethoxy acrylamide)	PEG-b-PIBOMAm	22.2	0.00565326	50	Worms + Vesicles	4
		22.2	0.00565326	75	Worms + Vesicles	4
		22.2	0.00565326	100	Vesicles	5
		22.2	0.00565326	200	Vesicles	5
Poly(ethyleneglycol-b-hydroxybutyl methacrylate)	PEG-b-PHBMA	19.6	0.0101	100	Vesicles	5
Poly(ethyleneglycol-b-hydroxypropyl methacrylate)	PEG-b-PHPMA	20	0.0059	100	Worms	3
Poly(ethyleneglycol-b-diacetone acrylamide)	PEG-b-PDAAm	24	0.0009	100	Sphers	1
